# Supplementary material for: Paving Behavior in Ants and Its Potential Application in Monitoring Two Urban Pest Ants, Solenopsis invicta and Tapinoma melanocephalum
Source: MDPI journal article supplement (doi:10.3390/insects14030219), 2023-02-23
Supplement: s1 [file s1]

**Paving Behavior in Ants and its Potential Application in Monitoring Two  
Urban Pest Ants, *Solenopsis invicta* and *Tapinoma melanocephalum***

**Supplementary Materials**

**Liming Shen <sup>1,†</sup>, Chao Wen <sup>2,†</sup>, Xuan Chen <sup>3,†</sup>, Yan Hua <sup>4</sup>, Chengju Du <sup>1</sup>, Jiacheng Cai <sup>5</sup>,  
Xiujun Wen <sup>1</sup>, Lei Wang <sup>6,\*</sup> and Cai Wang <sup>1,\*</sup>**

<sup>1</sup> College of Forestry and Landscape Architecture, South China Agricultural University, Guangzhou 510642, China; shenliming@stu.scau.edu.cn (L.S.); duchengju@stu.scau.edu.cn (C.D.);

wenxiujun@scau.edu.cn (X.W.)

<sup>2</sup> School of Grassland Science, Beijing Forestry University, Beijing 100083, China; wenchao@bjfu.edu.cn

<sup>3</sup> Department of Biological Sciences, Salisbury University, Salisbury, MD 21801, USA; xxchen@salisbury.edu

<sup>4</sup> Guangdong Provincial Key Laboratory of Silviculture, Protection and Utilization, Guangdong Academy of Forestry, Guangzhou 510520, China; wildlife530@hotmail.com

<sup>5</sup> Department of Mathematical Sciences, Salisbury University, Salisbury, MD 21801, USA; jxcai@salisbury.edu

<sup>6</sup> College of Plant Protection, South China Agricultural University, Guangzhou 510642, China

\* Correspondence: leiwang@scau.edu.cn (L.W.); wangcai@scau.edu.cn (C.W.)

† These authors contributed equally to this work.

**Table S1:** Location and basic information of field experiments.

| No. | Location                                                                                | GPS                     | Habitat Type                            | Monitoring Method | Date (yyyy/mm/dd) | Weather      |
|-----|-----------------------------------------------------------------------------------------|-------------------------|-----------------------------------------|-------------------|-------------------|--------------|
| 1   | Tianlu Lake, Huangpu District                                                           | 23.252° N<br>113.411° E | Nursery                                 | Baiting           | 2021/04/21        | Cloudy       |
|     |                                                                                         |                         |                                         | Taping            | 2021/04/23        |              |
| 2   | Campus of South China Agricultural University (SCAU), Tianhe District                   | 23.162° N<br>113.355° E | Green Space                             | Baiting           | 2021/07/22        | Sunny        |
|     |                                                                                         |                         |                                         | Taping            | 2021/07/24        |              |
| 3   | Zengcheng Teaching and Research Bases, SCAU, Zengcheng District                         | 23.239° N<br>113.633° E | Roadside and green belts along the road | Baiting           | 2021/10/26        | Cloudy       |
|     |                                                                                         |                         |                                         | Taping            | 2021/10/28        |              |
|     |                                                                                         |                         |                                         | Pitfall Trapping  | 2021/10/31        |              |
| 4   | Furong Travel Resort, Huadu District                                                    | 23.512° N<br>113.234° E | Forestry Land                           | Baiting           | 2021/11/02        | Sunny        |
|     |                                                                                         |                         |                                         | Taping            | 2021/11/04        |              |
| 5   | Qilingbei Research Station, SCAU, Tianhe District                                       | 23.169° N<br>113.366° E | Roadside and green belts along the road | Baiting           | 2021/11/11        | Sunny        |
|     |                                                                                         |                         |                                         | Taping            | 2021/11/13        |              |
| 6   | River bank of Qilingbei Research Station, SCAU, Tianhe District                         | 23.166° N<br>113.361° E | Grass Land                              | Baiting           | 2021/11/12        | Sunny        |
|     |                                                                                         |                         |                                         | Taping            | 2021/11/14        |              |
| 7   | Songmao Nursery, Baiyun District                                                        | 23.367° N<br>113.396° E | Agricultural land                       | Baiting           | 2021/12/09        | Cloudy       |
|     |                                                                                         |                         |                                         | taping            | 2021/12/13        |              |
| 8   | Seedling nursery near Institute of Gardening of Guangzhou, Baiyun District              | 23.261° N<br>113.302° E | Nursery                                 | Baiting           | 2021/11/18        | Overcast Sky |
|     |                                                                                         |                         |                                         | Taping            | 2021/11/21        |              |
| 9   | Around the Sports Ground of South China Agricultural University (SCAU), Tianhe District | 23.161° N<br>113.369° E | Bush                                    | Baiting           | 2021/11/17        | Overcast Sky |
|     |                                                                                         |                         |                                         | Taping            | 2021/11/19        |              |
| 10  | Shangdongkeng Village, Baiyun District                                                  | 23.270° N<br>113.436° E | Roadside and green belts along the road | Baiting           | 2021/12/03        | Sunny        |
|     |                                                                                         |                         |                                         | Taping            | 2021/12/12        |              |
| 11  | Xuhui Housing Estate, Baiyun District                                                   | 23.370° N<br>113.387° E | Roadside and green belts along the road | Baiting           | 2021/12/10        | Cloudy       |
|     |                                                                                         |                         |                                         | Taping            | 2021/12/15        |              |
| 12  |                                                                                         | 23.261° N               | Nursery                                 | Taping            | 2021/12/01        | Sunny        |

|    |                                                                       |                         |                                         |                  |            |                 |
|----|-----------------------------------------------------------------------|-------------------------|-----------------------------------------|------------------|------------|-----------------|
|    | Institute of Gardening of Guangzhou (Dongping Bases), Baiyun District | 113.304° E              |                                         | Baiting          | 2021/12/06 |                 |
| 13 | Zhongluotan Nursery, Baiyun District                                  | 23.364° N<br>113.440° E | Nursery                                 | Taping           | 2021/12/02 | Overcast<br>Sky |
|    |                                                                       |                         |                                         | Baiting          | 2021/12/07 |                 |
|    |                                                                       |                         |                                         | Pitfall Trapping | 2021/12/17 |                 |
| 14 | Yingchun Road, Huadu District                                         | 23.353° N<br>113.251° E | Roadside and green belts along the road | Taping           | 2021/11/31 | Sunny           |
|    |                                                                       |                         |                                         | Baiting          | 2021/12/04 |                 |
| 15 | Longda Village, Baiyun District                                       | 23.392° N<br>113.388° E | Agricultural Land                       | Taping           | 2022/03/08 | Sunny           |
|    |                                                                       |                         |                                         | Baiting          | 2022/03/12 |                 |
| 16 | Maofeng Mountain, Baiyun District                                     | 23.270° N<br>113.443° E | Roadside and Bush                       | Taping           | 2022/03/13 | Sunny           |
|    |                                                                       |                         |                                         | Baiting          | 2022/03/15 |                 |
| 17 | Shimen National Forest Park, Conghua District                         | 23.622° N<br>113.787° E | Roadside and Forestry land              | Taping           | 2022/07/12 | Sunny           |
|    |                                                                       |                         |                                         | Baiting          | 2022/07/14 |                 |
| 18 | Baiyun Mountain, Baiyun District                                      | 23.198° N<br>113.299° E | Forestry land and grass land            | Taping           | 2022/07/24 | Sunny           |
|    |                                                                       |                         |                                         | Baiting          | 2022/07/26 |                 |
| 19 | Wudantian, Zengcheng District                                         | 22.921° N<br>113.511° E | Nursery                                 | Taping           | 2022/09/17 | Sunny           |
|    |                                                                       |                         |                                         | Baiting          | 2022/09/20 |                 |
| 20 | Zhonglyu Mangrove Nursery, Panyu District                             | 23.386° N<br>113.589° E | Nursery and Roadside                    | Taping           | 2022/09/25 | Sunny           |
|    |                                                                       |                         |                                         | Baiting          | 2022/09/27 |                 |

**Table S2.** ANOVA summary of the linear regression model with particle size as dependent variable and head width and ant species as independent variables.

|                                 | DF  | Sum Sq | Mean Sq | <i>F</i> -value | <i>P</i> -value |
|---------------------------------|-----|--------|---------|-----------------|-----------------|
| Head width                      | 1   | 81.23  | 81.23   | 227.66          | <0.001          |
| Ant species                     | 3   | 15.43  | 5.14    | 14.41           | <0.001          |
| Head width $\times$ Ant species | 3   | 3.21   | 1.07    | 3               | 0.03            |
| residuals                       | 561 | 200.17 | 0.36    |                 |                 |



|    |     |       |       |       |      |          |        |
|----|-----|-------|-------|-------|------|----------|--------|
| 10 | 200 | 50 a  | 46 a  | 44 a  | -    | B vs SA  | 0.2500 |
|    |     |       |       |       |      | B vs PA  | 0.1892 |
|    |     |       |       |       |      | PA vs SA | 0.2500 |
| 11 | 199 | 109 a | 100 b | 100 b | -    | B vs SA  | 0.0414 |
|    |     |       |       |       |      | B vs PA  | 0.0414 |
|    |     |       |       |       |      | PA vs SA | 1.0000 |
| 12 | 200 | 60 a  | 58 a  | 54 a  | -    | B vs SA  | 0.6291 |
|    |     |       |       |       |      | B vs PA  | 0.1435 |
|    |     |       |       |       |      | PA vs SA | 0.0625 |
| 13 | 200 | 69 a  | 67 a  | 65 a  | 70 a | B vs SA  | 0.4531 |
|    |     |       |       |       |      | B vs PA  | 0.1797 |
|    |     |       |       |       |      | PA vs SA | 0.2500 |
|    |     |       |       |       |      | B vs PT  | 0.6875 |
|    |     |       |       |       |      | SA vs PT | 0.2891 |
|    |     |       |       |       |      | PA vs PT | 0.1094 |
| 14 | 200 | 75 a  | 74 a  | 72 a  | -    | B vs SA  | 0.8238 |
|    |     |       |       |       |      | B vs PA  | 0.5235 |
|    |     |       |       |       |      | PA vs SA | 0.2500 |
| 15 | 195 | 62 a  | 60 a  | 52 b  | -    | B vs SA  | 0.6636 |
|    |     |       |       |       |      | B vs PA  | 0.0347 |
|    |     |       |       |       |      | PA vs SA | 0.0078 |
| 16 | 198 | 66 b  | 78 a  | 77 a  | -    | B vs SA  | 0.0192 |
|    |     |       |       |       |      | B vs PA  | 0.0290 |
|    |     |       |       |       |      | PA vs SA | 1.0000 |
| 17 | 196 | 0 a   | 0 a   | 0 a   | -    | B vs SA  | 1.0000 |
|    |     |       |       |       |      | B vs PA  | 1.0000 |
|    |     |       |       |       |      | PA vs SA | 1.0000 |
| 18 | 196 | 2 a   | 2 a   | 2 a   | -    | B vs SA  | 1.0000 |
|    |     |       |       |       |      | B vs PA  | 1.0000 |
|    |     |       |       |       |      | PA vs SA | 1.0000 |
| 19 | 191 | 93 a  | 99 a  | 99 a  | -    | B vs SA  | 0.0654 |
|    |     |       |       |       |      | B vs PA  | 0.0654 |
|    |     |       |       |       |      | PA vs SA | 1.0000 |
| 20 | 181 | 95 a  | 99 a  | 97 a  | -    | B vs SA  | 0.2265 |
|    |     |       |       |       |      | B vs PA  | 0.5811 |
|    |     |       |       |       |      | PA vs SA | 0.2500 |

**Table S4.** Number of monitors (bait, tape, or pitfall trap) detecting *Tapinoma melanocephalum* at each location. “-” indicates pitfall traps were not tested in the location. Different letters within the same row indicate significant differences ( $p < 0.05$ ).

|     |              | Number of sites detecting <i>Tapinoma melanocephalum</i> |                                                   |                                |                       | Statistical Results |               |
|-----|--------------|----------------------------------------------------------|---------------------------------------------------|--------------------------------|-----------------------|---------------------|---------------|
| No. | No. of sites | Taping                                                   |                                                   |                                | Pitfall Trapping (PT) | Comparisons         | Mid- <i>P</i> |
|     |              | Baiting (B)                                              | Determined by ant infestation on the sausage (SA) | Determined by tape paving (PA) |                       |                     |               |
| 1   | 224          | 6 a                                                      | 2 a                                               | 2 a                            | -                     | B vs SA             | 0.0625        |
|     |              |                                                          |                                                   |                                |                       | B vs PA             | 0.0625        |
|     |              |                                                          |                                                   |                                |                       | PA vs SA            | 1.0000        |
| 2   | 224          | 92 a                                                     | 82 a                                              | 82 a                           | -                     | B vs SA             | 0.0576        |
|     |              |                                                          |                                                   |                                |                       | B vs PA             | 0.0576        |
|     |              |                                                          |                                                   |                                |                       | PA vs SA            | 1.0000        |
| 3   | 199          | 98 a                                                     | 85 b                                              | 85 b                           | 97 a                  | B vs SA             | 0.0385        |
|     |              |                                                          |                                                   |                                |                       | B vs PA             | 0.0385        |
|     |              |                                                          |                                                   |                                |                       | PA vs SA            | 1.0000        |
|     |              |                                                          |                                                   |                                |                       | B vs PT             | 0.8957        |
|     |              |                                                          |                                                   |                                |                       | SA vs PT            | 0.0919        |
|     |              |                                                          |                                                   |                                |                       | PA vs PT            | 0.0919        |
| 4   | 200          | 0 a                                                      | 0 a                                               | 0 a                            | -                     | B vs SA             | 1.0000        |
|     |              |                                                          |                                                   |                                |                       | B vs PA             | 1.0000        |
|     |              |                                                          |                                                   |                                |                       | PA vs SA            | 1.0000        |
| 5   | 199          | 0 a                                                      | 0 a                                               | 0 a                            | -                     | B vs SA             | 1.0000        |
|     |              |                                                          |                                                   |                                |                       | B vs PA             | 1.0000        |
|     |              |                                                          |                                                   |                                |                       | PA vs SA            | 1.0000        |
| 6   | 197          | 19 a                                                     | 18 a                                              | 18 a                           | -                     | B vs SA             | 0.8036        |
|     |              |                                                          |                                                   |                                |                       | B vs PA             | 0.8036        |
|     |              |                                                          |                                                   |                                |                       | PA vs SA            | 1.0000        |
| 7   | 200          | 2 a                                                      | 2 a                                               | 2 a                            | -                     | B vs SA             | 1.0000        |
|     |              |                                                          |                                                   |                                |                       | B vs PA             | 1.0000        |
|     |              |                                                          |                                                   |                                |                       | PA vs SA            | 1.0000        |
| 8   | 200          | 14 a                                                     | 16 a                                              | 16 a                           | -                     | B vs SA             | 0.3750        |
|     |              |                                                          |                                                   |                                |                       | B vs PA             | 0.3750        |
|     |              |                                                          |                                                   |                                |                       | PA vs SA            | 1.0000        |
| 9   | 199          | 19 a                                                     | 17 a                                              | 17 a                           | -                     | B vs SA             | 0.4531        |
|     |              |                                                          |                                                   |                                |                       | B vs PA             | 0.4531        |
|     |              |                                                          |                                                   |                                |                       | PA vs SA            | 1.0000        |

|    |     |      |      |      |     |          |        |
|----|-----|------|------|------|-----|----------|--------|
| 10 | 200 | 0 a  | 0 a  | 0 a  | -   | B vs SA  | 1.0000 |
|    |     |      |      |      |     | B vs PA  | 1.0000 |
|    |     |      |      |      |     | PA vs SA | 1.0000 |
| 11 | 199 | 33 a | 38 a | 37 a | -   | B vs SA  | 0.2101 |
|    |     |      |      |      |     | B vs PA  | 0.3323 |
|    |     |      |      |      |     | PA vs SA | 0.5000 |
| 12 | 200 | 2 a  | 1 a  | 1 a  | -   | B vs SA  | 0.5000 |
|    |     |      |      |      |     | B vs PA  | 0.5000 |
|    |     |      |      |      |     | PA vs SA | 1.0000 |
| 13 | 200 | 8 a  | 6 a  | 6 a  | 5 a | B vs SA  | 0.3750 |
|    |     |      |      |      |     | B vs PA  | 0.3750 |
|    |     |      |      |      |     | PA vs SA | 1.0000 |
|    |     |      |      |      |     | B vs PT  | 0.4531 |
|    |     |      |      |      |     | SA vs PT | 0.1797 |
|    |     |      |      |      |     | PA vs PT | 0.1797 |
| 14 | 200 | 17 a | 15 a | 15 a | -   | B vs SA  | 0.4231 |
|    |     |      |      |      |     | B vs PA  | 0.4231 |
|    |     |      |      |      |     | PA vs SA | 1.0000 |
| 15 | 195 | 7 a  | 7 a  | 7 a  | -   | B vs SA  | 1.0000 |
|    |     |      |      |      |     | B vs PA  | 1.0000 |
|    |     |      |      |      |     | PA vs SA | 1.0000 |
| 16 | 198 | 17 a | 6 b  | 5 b  | -   | B vs SA  | 0.0005 |
|    |     |      |      |      |     | B vs PA  | 0.0002 |
|    |     |      |      |      |     | PA vs SA | 1.0000 |
| 17 | 196 | 0 a  | 0 a  | 0 a  | -   | B vs SA  | 1.0000 |
|    |     |      |      |      |     | B vs PA  | 1.0000 |
|    |     |      |      |      |     | PA vs SA | 1.0000 |
| 18 | 196 | 9 a  | 9 a  | 9 a  | -   | B vs SA  | 1.0000 |
|    |     |      |      |      |     | B vs PA  | 1.0000 |
|    |     |      |      |      |     | PA vs SA | 1.0000 |
| 19 | 191 | 2 a  | 2 a  | 2 a  | -   | B vs SA  | 1.0000 |
|    |     |      |      |      |     | B vs PA  | 1.0000 |
|    |     |      |      |      |     | PA vs SA | 1.0000 |
| 20 | 181 | 5 a  | 5 a  | 4 a  | -   | B vs SA  | 1.0000 |
|    |     |      |      |      |     | B vs PA  | 1.0000 |
|    |     |      |      |      |     | PA vs SA | 0.5000 |





|    |     |       |       |       |      |          |          |
|----|-----|-------|-------|-------|------|----------|----------|
| 10 | 200 | 114 a | 124 a | 2 b   | -    | B vs SA  | 0.0989   |
|    |     |       |       |       |      | B vs PA  | < 0.0001 |
|    |     |       |       |       |      | PA vs SA | < 0.0001 |
| 11 | 199 | 24 a  | 31 a  | 0 b   | -    | B vs SA  | 0.0768   |
|    |     |       |       |       |      | B vs PA  | < 0.0001 |
|    |     |       |       |       |      | PA vs SA | < 0.0001 |
| 12 | 200 | 43 a  | 41 a  | 0 b   | -    | B vs SA  | 0.6636   |
|    |     |       |       |       |      | B vs PA  | < 0.0001 |
|    |     |       |       |       |      | PA vs SA | < 0.0001 |
| 13 | 200 | 95 a  | 104 a | 5 b   | 99 a | B vs SA  | 0.0872   |
|    |     |       |       |       |      | B vs PA  | < 0.0001 |
|    |     |       |       |       |      | PA vs SA | < 0.0001 |
|    |     |       |       |       |      | B vs PT  | 0.4421   |
|    |     |       |       |       |      | SA vs PT | 0.2632   |
|    |     |       |       |       |      | PA vs PT | < 0.0001 |
| 14 | 200 | 45 b  | 53 a  | 0 c   | -    | B vs SA  | 0.0225   |
|    |     |       |       |       |      | B vs PA  | < 0.0001 |
|    |     |       |       |       |      | PA vs SA | < 0.0001 |
| 15 | 195 | 78 a  | 80 a  | 0 b   | -    | B vs SA  | 0.7201   |
|    |     |       |       |       |      | B vs PA  | < 0.0001 |
|    |     |       |       |       |      | PA vs SA | < 0.0001 |
| 16 | 198 | 47 b  | 70 a  | 3 c   | -    | B vs SA  | 0.0056   |
|    |     |       |       |       |      | B vs PA  | < 0.0001 |
|    |     |       |       |       |      | PA vs SA | < 0.0001 |
| 17 | 196 | 182 a | 175 a | 148 b | -    | B vs SA  | 0.0768   |
|    |     |       |       |       |      | B vs PA  | < 0.0001 |
|    |     |       |       |       |      | PA vs SA | < 0.0001 |
| 18 | 196 | 120 b | 130 a | 74 c  | -    | B vs SA  | 0.0127   |
|    |     |       |       |       |      | B vs PA  | < 0.0001 |
|    |     |       |       |       |      | PA vs SA | < 0.0001 |
| 19 | 191 | 19 a  | 17 a  | 0 b   | -    | B vs SA  | 0.2500   |
|    |     |       |       |       |      | B vs PA  | < 0.0001 |
|    |     |       |       |       |      | PA vs SA | < 0.0001 |
| 20 | 181 | 51 a  | 45 a  | 5 b   | -    | B vs SA  | 0.0923   |
|    |     |       |       |       |      | B vs PA  | < 0.0001 |
|    |     |       |       |       |      | PA vs SA | < 0.0001 |

**Front View**

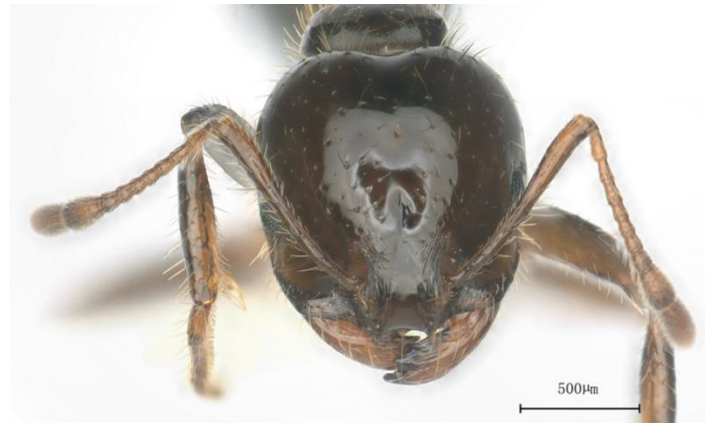

**Side View**

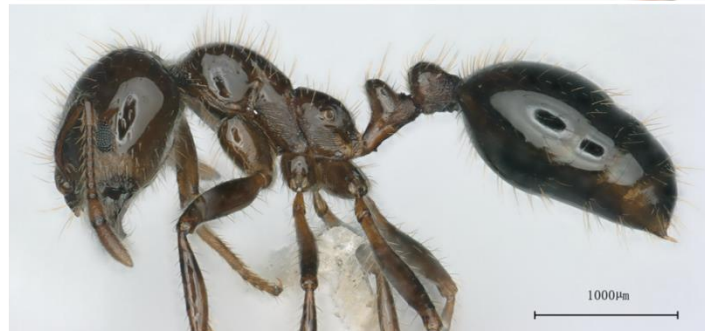

**Back View**

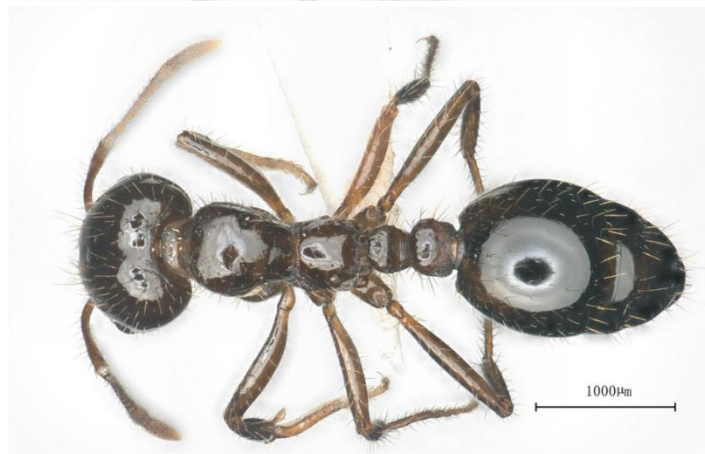

**Figure S1.** Front view, side view, and vertical view of the red imported fire ant, *Solenopsis invicta* Buren (Formicidae: Myrmicinae).

**Front View**

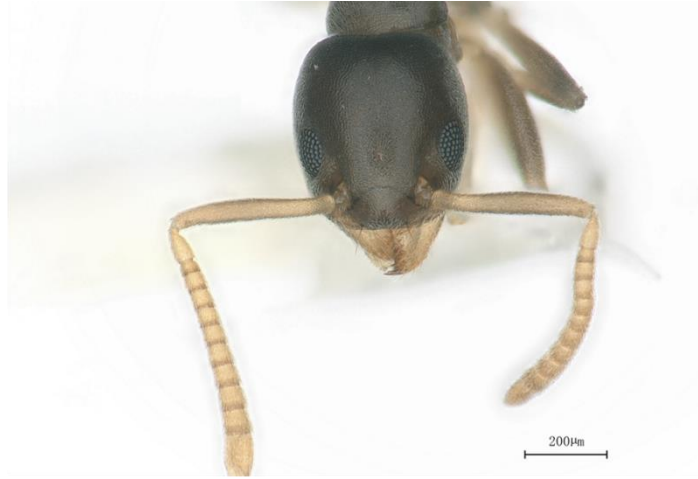

**Side View**

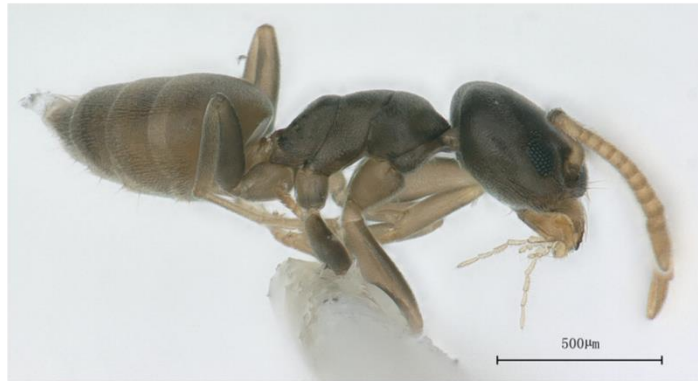

**Back View**

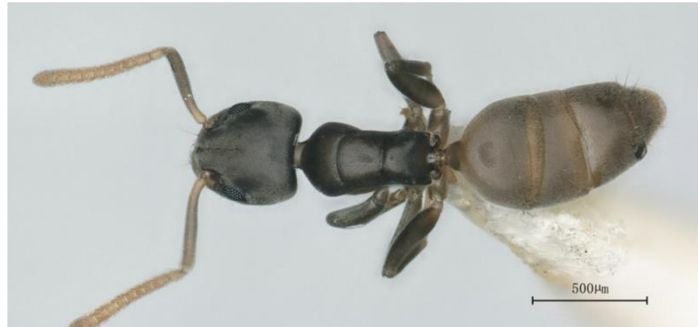

**Figure S2.** Front view, side view, and vertical view of the ghost ant, *Tapinoma melanocephalum* (Fabricius) (Formicidae: Dolichoderinae).

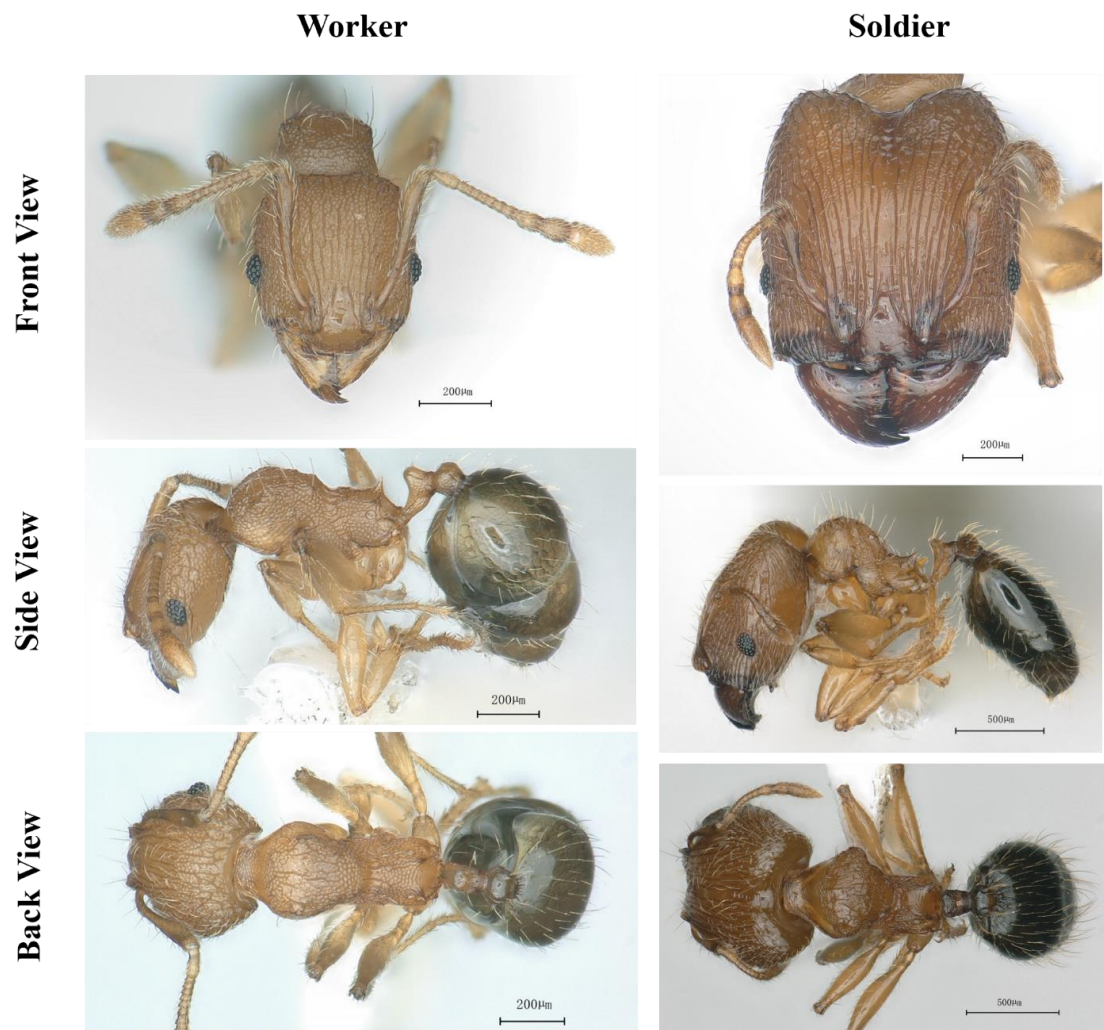

**Figure S3.** Front view, side view, and vertical view of *Pheidole parva* Mayr (Formicidae: Myrmicinae).

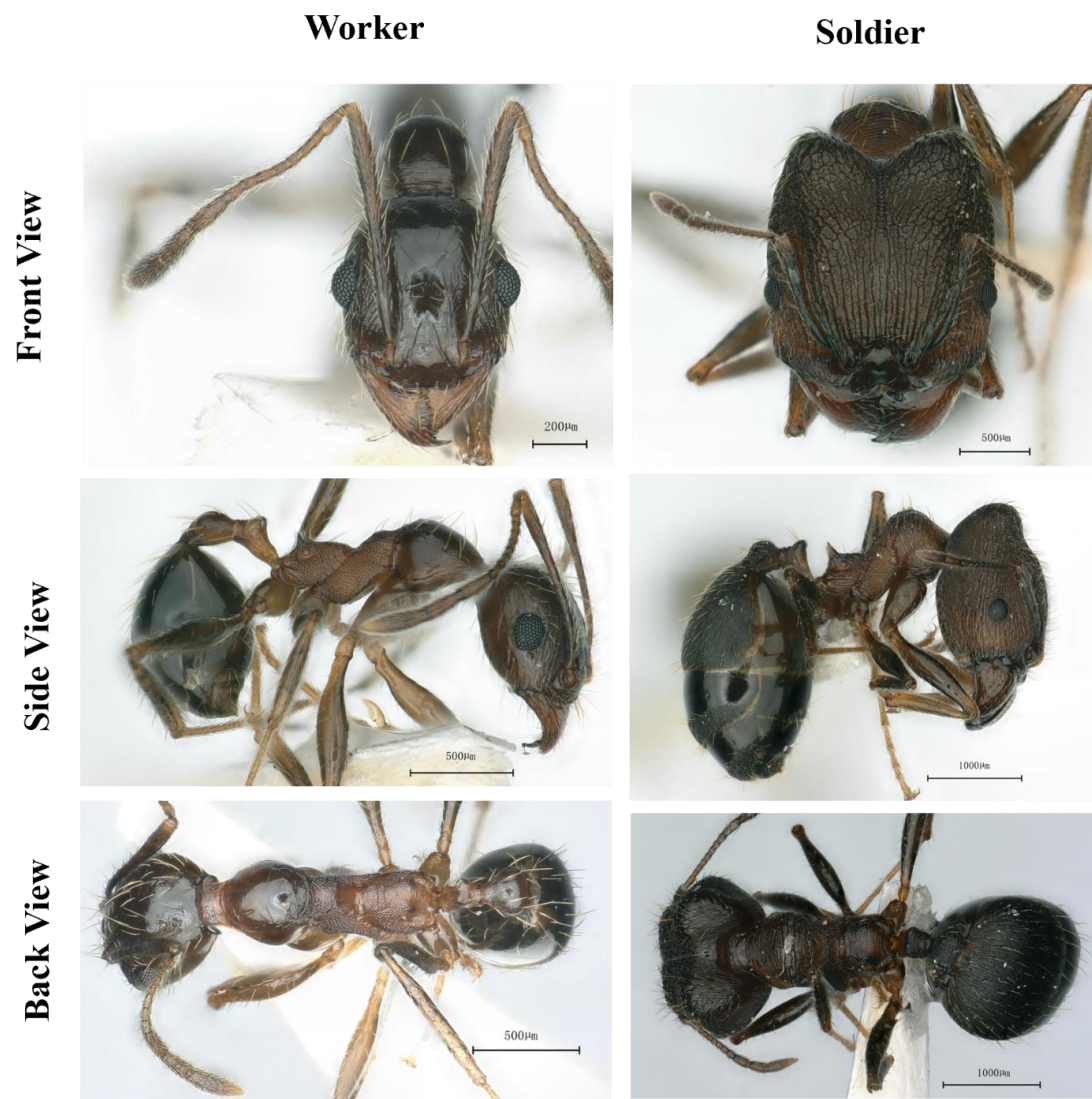

**Figure S4.** Front view, side view, and vertical view of *Pheidole yeensis* Forel (Formicidae: Myrmicinae).



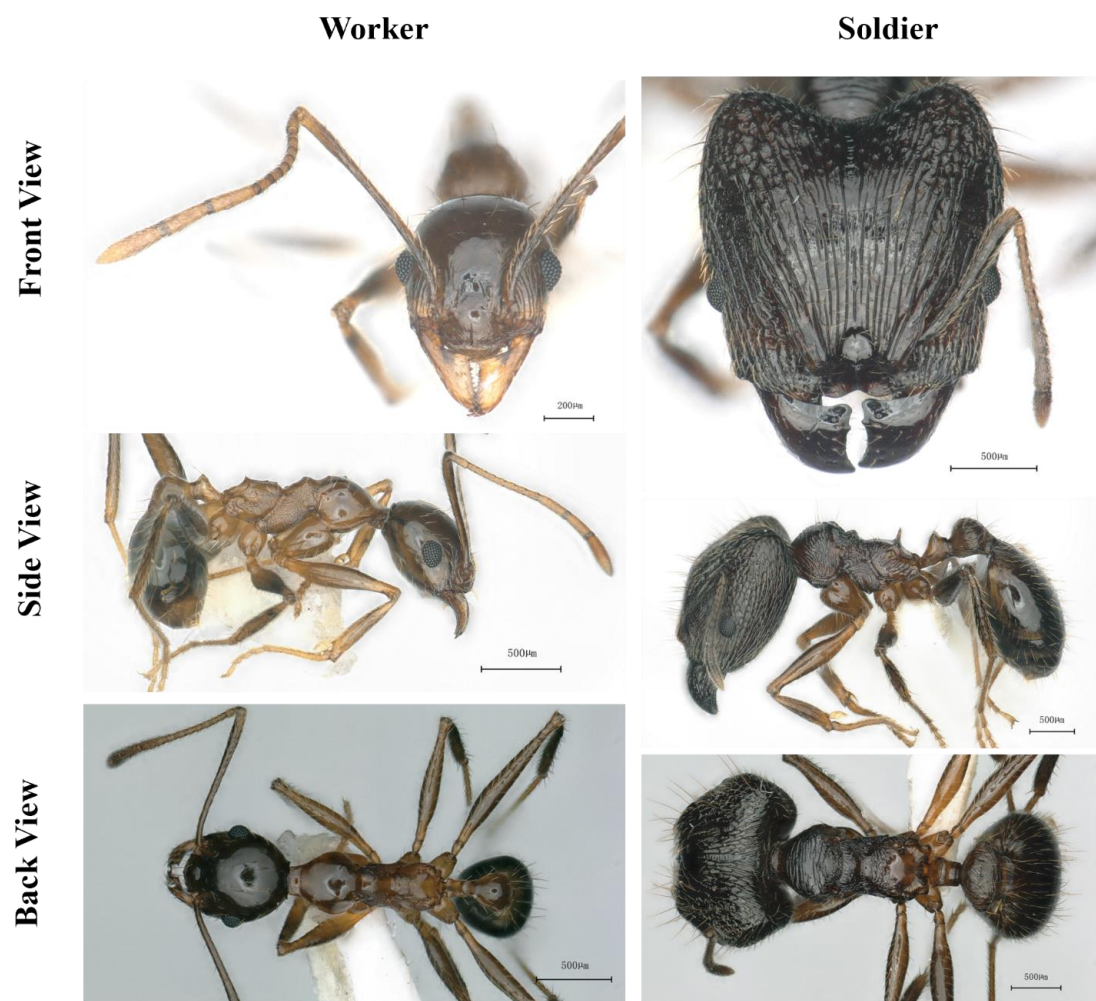

**Figure S5.** Front view, side view, and vertical view of *Pheidole nodus* Smith (Formicidae: Myrmicinae).

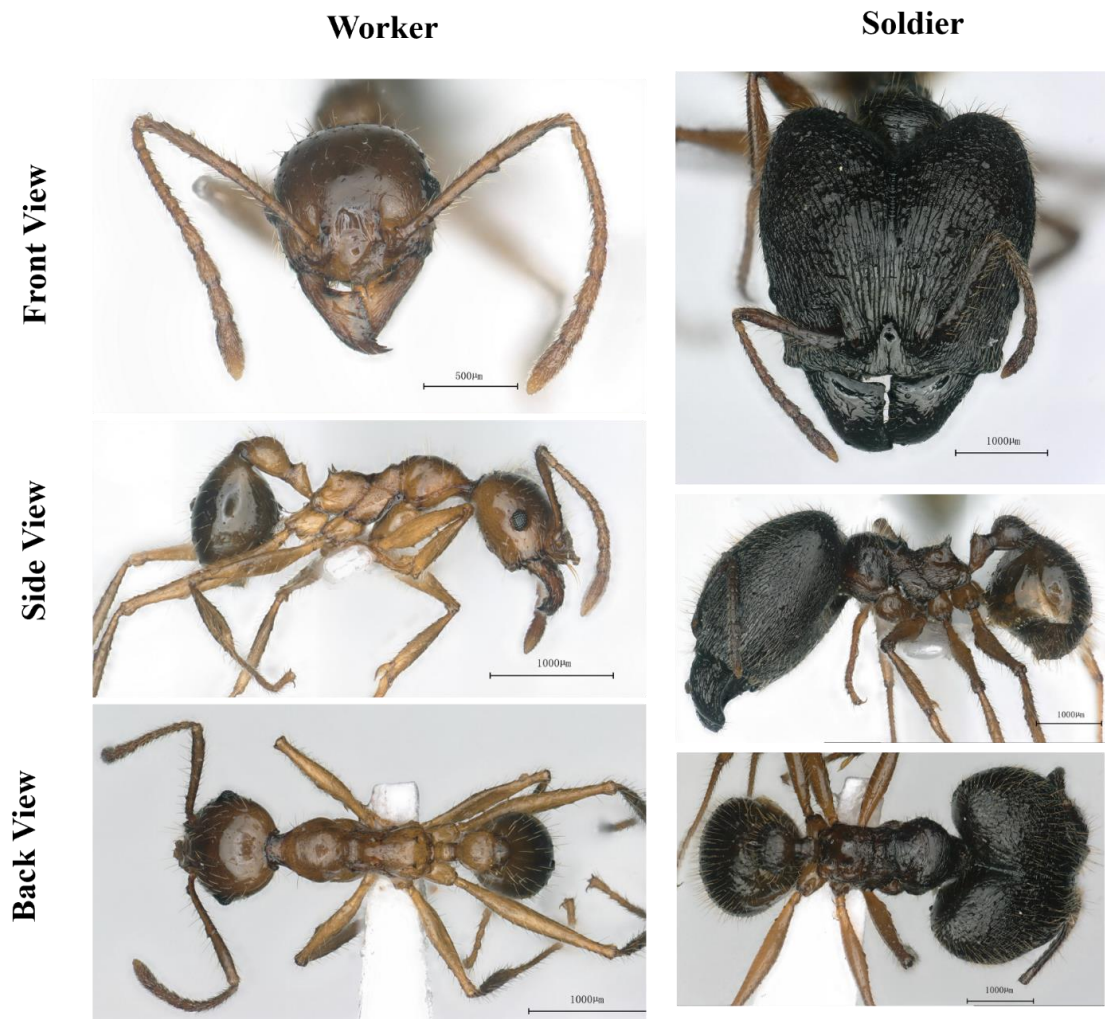

**Figure S6.** Front view, side view, and vertical view of *Pheidole sinica* Wu & Wang (Formicidae: Myrmicinae).



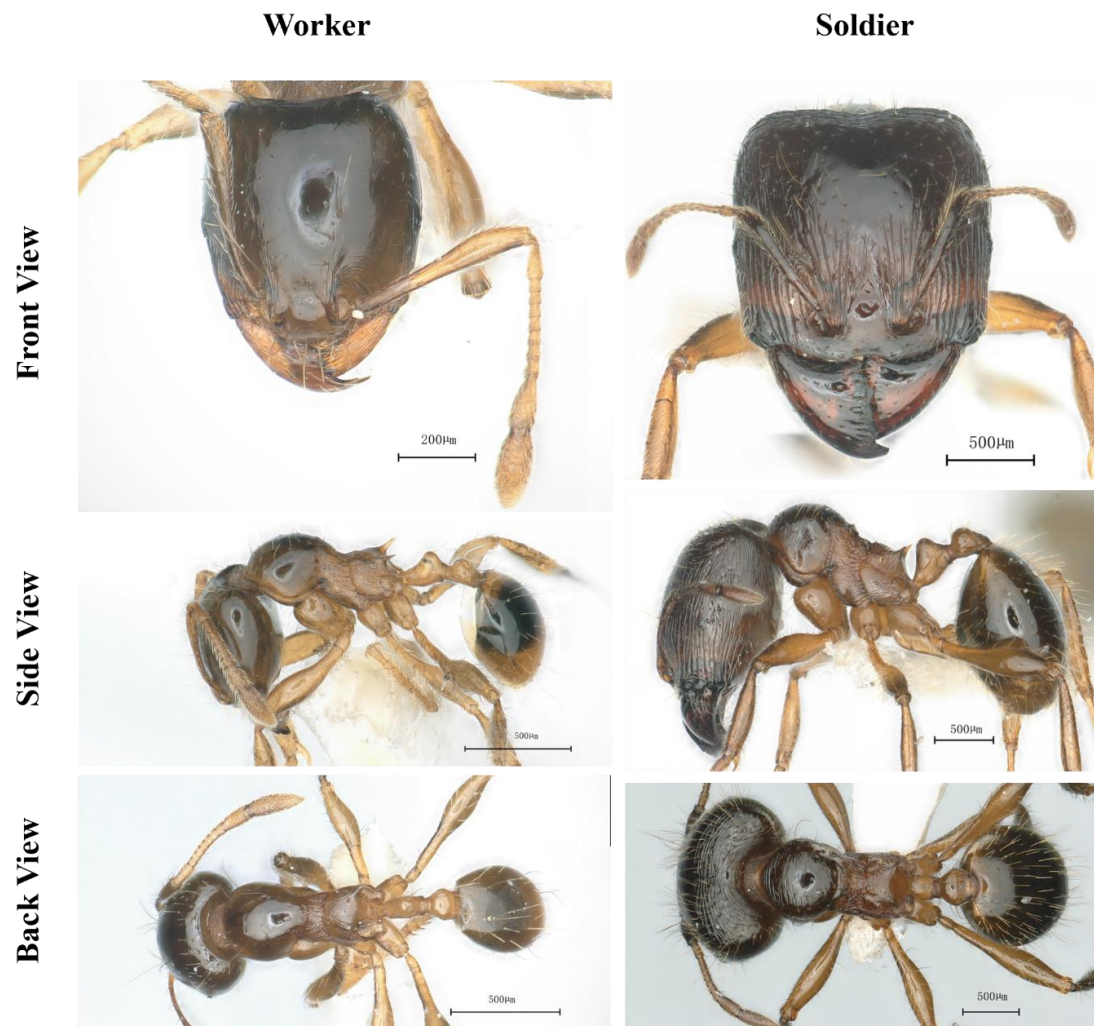

**Figure S7.** Front view, side view, and vertical view of *Carebara affinis* (Jerdon) (Formicidae: Myrmicinae).

**Front View**

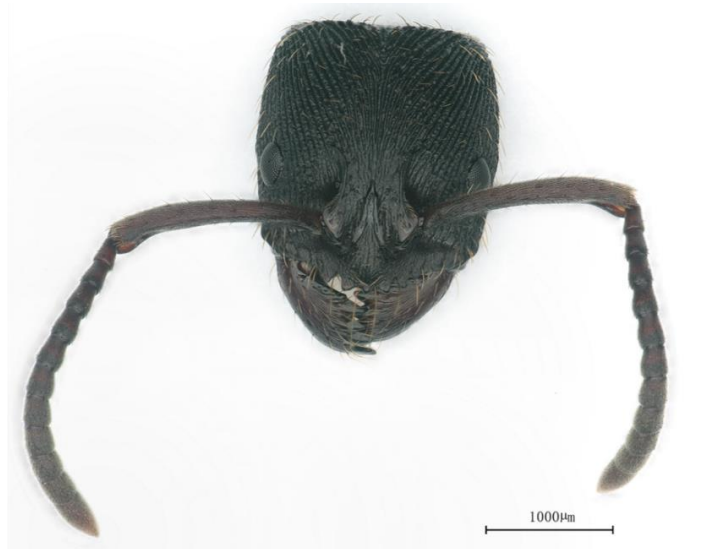

**Side View**

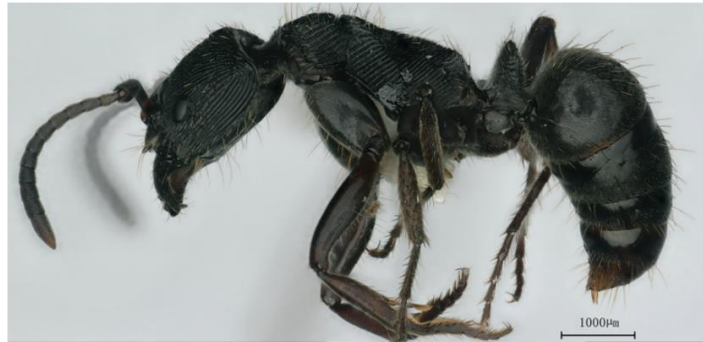

**Back View**

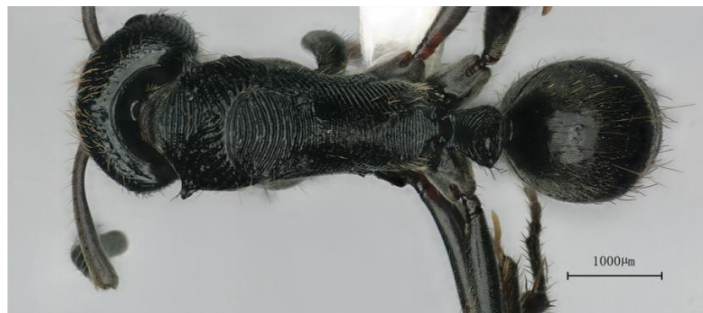

**Figure S8.** Front view, side view, and vertical view of *Odontoponera transversa* (Smith) (Formicidae: Ponerinae).

**Front View**

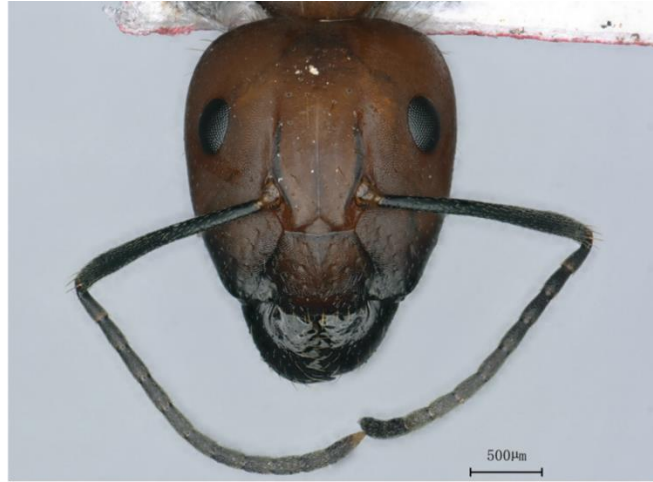

**Side View**

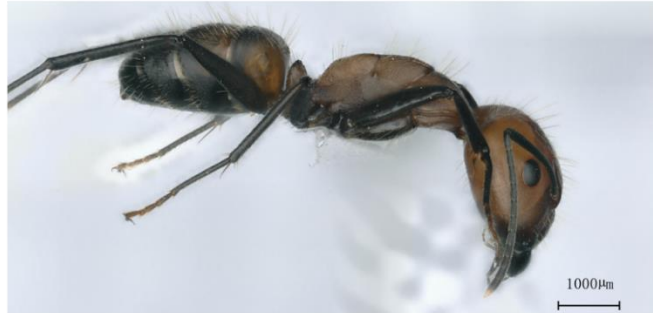

**Back View**

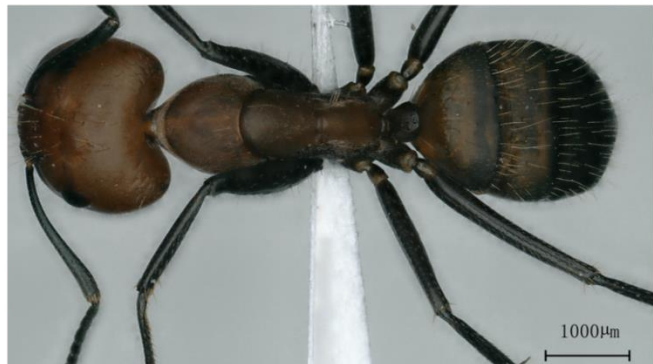

**Figure S9.** Front view, side view, and vertical view of *Camponotus nicobarensis* Mayr (Formicidae: Formicinae).

### Key of ant species that paved adhesive tapes in this study

|                                                                                                                  |                                |
|------------------------------------------------------------------------------------------------------------------|--------------------------------|
| 1 Petiole only (waist consisting of one node) or not obvious .....                                               | 2                              |
| - Postpetiole exist (waist consisting of two nodes) .....                                                        | 4                              |
| 2 (1). Petiole not obvious, short hairs on thorax, color of antenna is brighter than that of head.....           | <i>Tapinoma melanocephalum</i> |
| - Petiole obvious, erect and long hairs on thorax, color of antenna is the same or darker than that of head..... | 3                              |
| 3 (2). Head, thorax, and abdomen were black; obvious striate sculpture on head and thorax.....                   | <i>Odontoponera transversa</i> |
| - Head, thorax, and part of the abdomen were dark orange; smooth body surface.....                               | <i>Camponotus nicobarensis</i> |
| 4 (1). 3-segmented apical club.....                                                                              | <i>Pheidole</i>                |
| - Last two antennal segments enlarged.....                                                                       | 5                              |
| 5 (4). Thorax with a pair of spines .....                                                                        | <i>Carebara affinis</i>        |
| - Thorax without spine.....                                                                                      | <i>Solenopsis invicta</i>      |

**Figure S10.** A key of tape-paving ant species (*Solenopsis invicta*, *Tapinoma melanocephalum*, *Pheidole* spp., *Carebara affinis*, *Camponotus nicobarensis*, and *Odontoponera transversa*) in this study.
